# Supplementary material
Source: PubMed Central journal article supplement (PMC2265193)

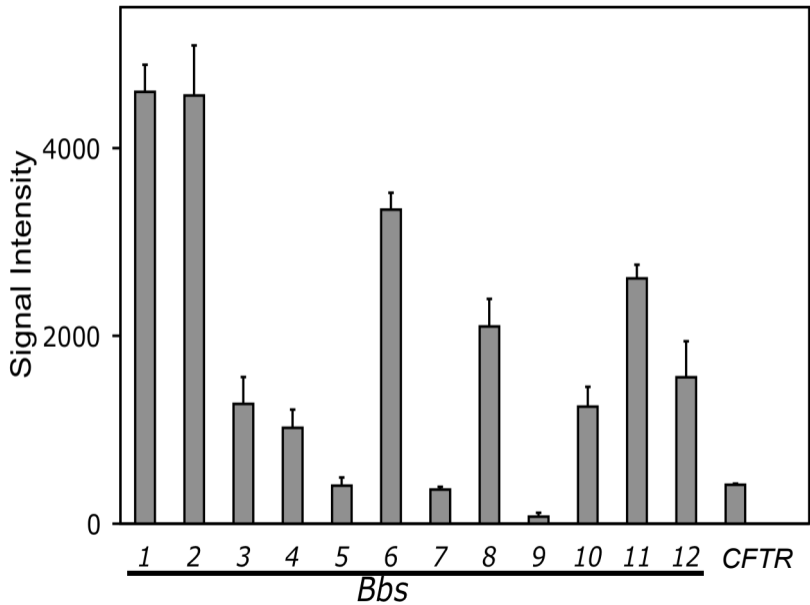

Supplement: pnas_0712327105_1.pdf [file pnas_0712327105_1.pdf]

Cos-7

BBS4

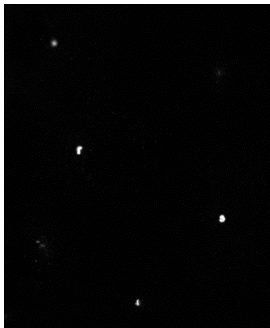

Pericentrin

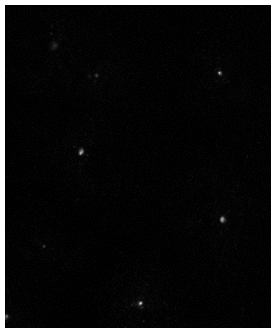

DAPI

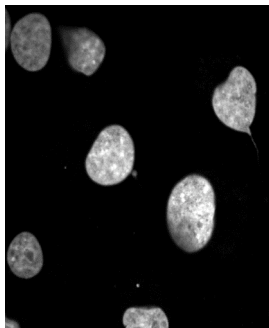

MERGE

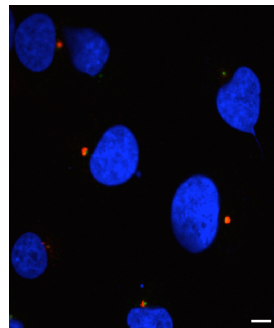

HeLa

BBS4

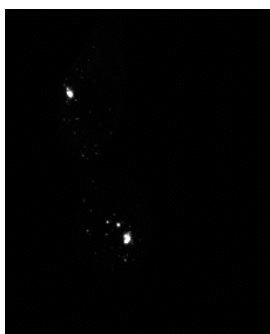

Pericentrin

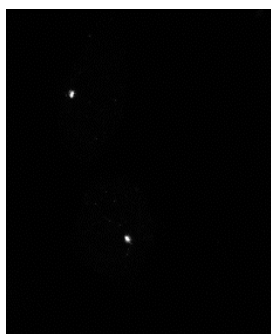

DAPI

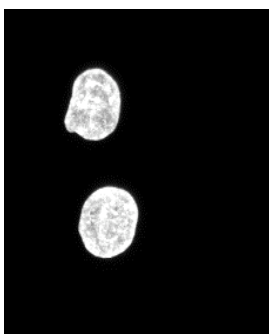

MERGE

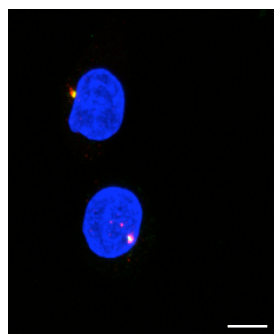

Uninfected Cos-7

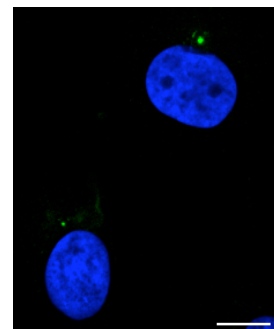

Supplement: pnas_0712327105_2.pdf [file pnas_0712327105_2.pdf]

**A**

Wild-type

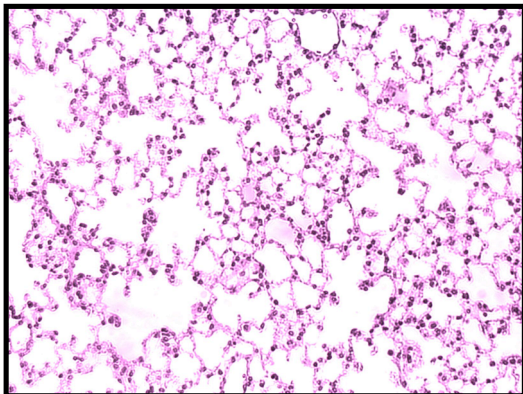*Bbs2*<sup>-/-</sup>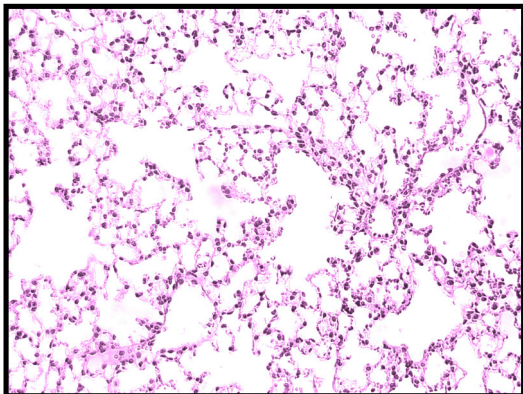**B**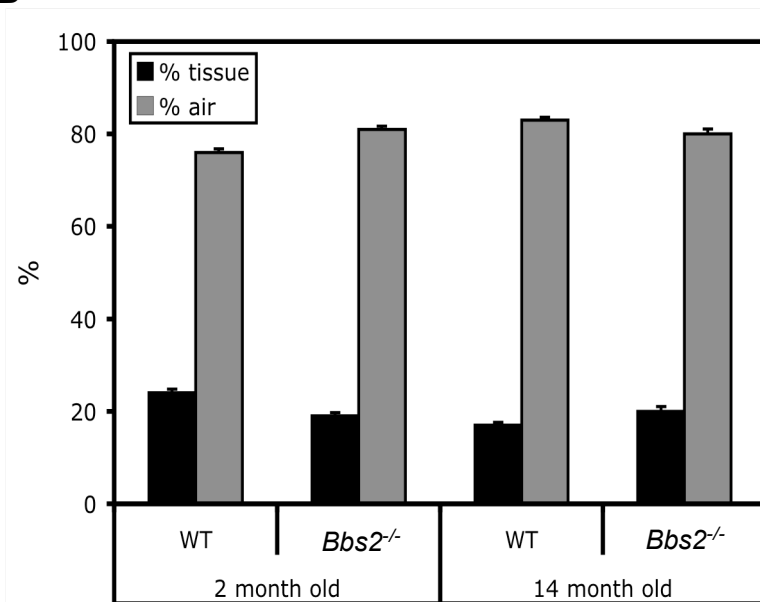

Supplement: pnas_0712327105_3.pdf [file pnas_0712327105_3.pdf]

**A**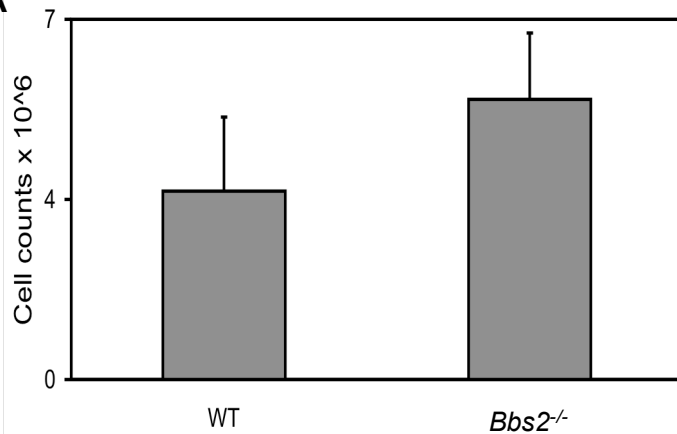**B**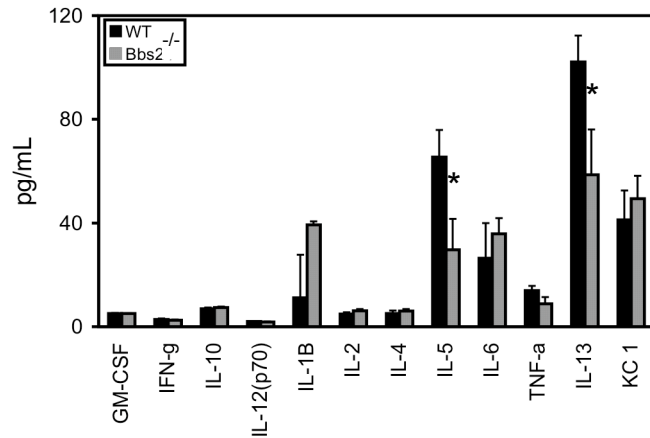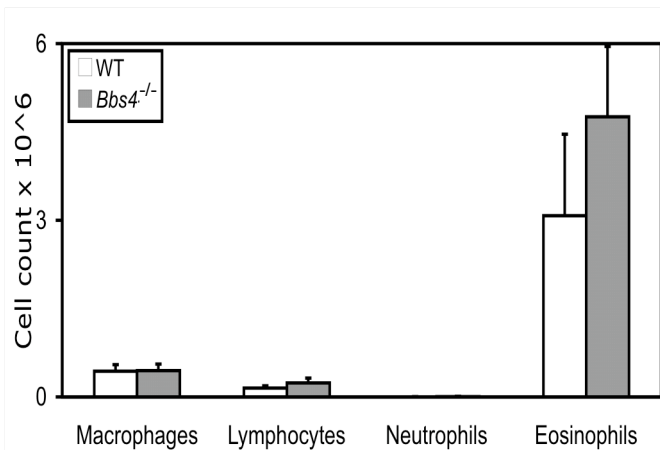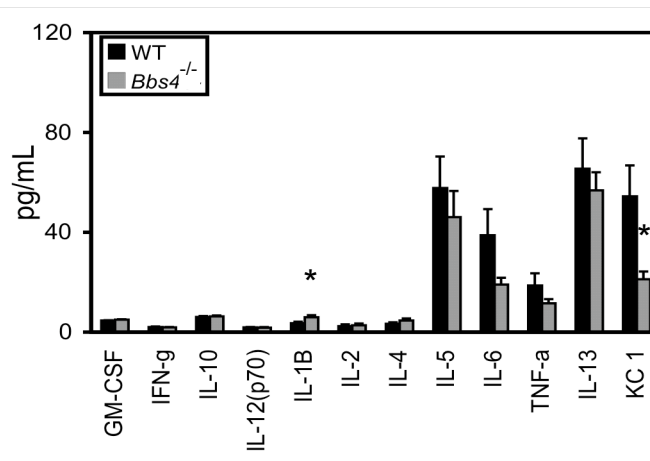

Supplement: pnas_0712327105_4.pdf [file pnas_0712327105_4.pdf]
